# Supplementary material for: In vivo detection of fluoride at trace levels and its removal from raw water at neutral pH utilizing a cyanobacterium pigment as a luminescent probe
Source: Royal Society of Chemistry journal article supplement (doi:10.1039/c5ra24713f), 2015-12-22
Supplement: c5ra24713f1.pdf [file c5ra24713f1.pdf]

*Supplementary file:*

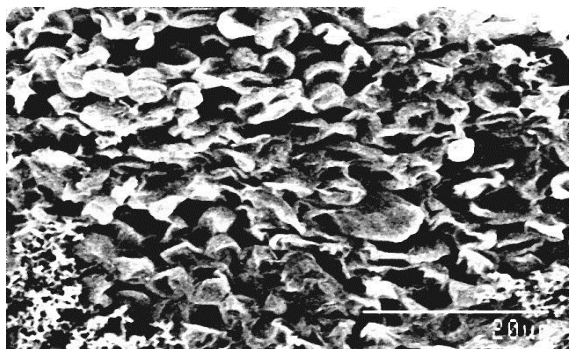

a

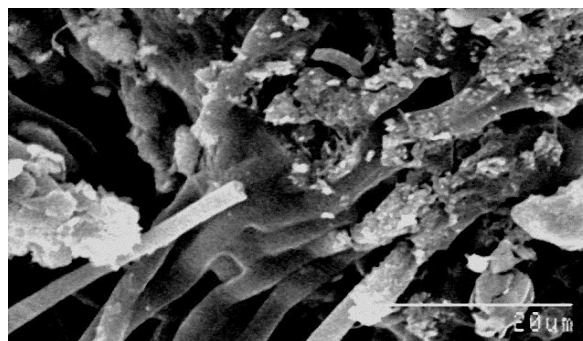

b

**Fig. S1:** SEM images of inactivated Bio-mass (a) Bio-mass (b) Bio-mass loaded with  $F^-$

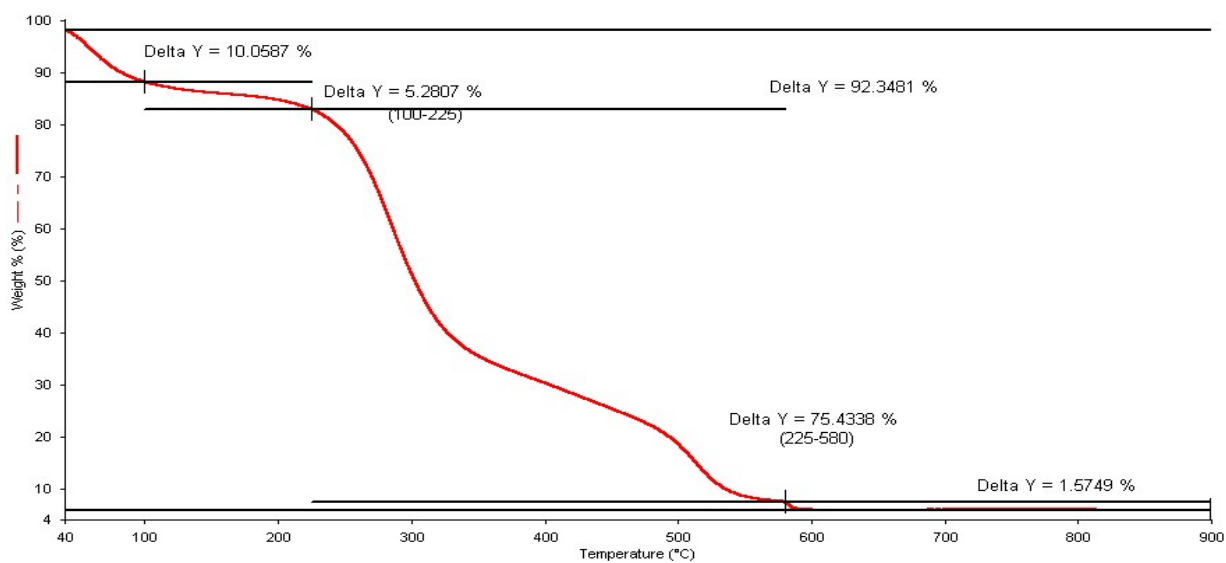

**Fig. S2:** TGA curve of pure algae

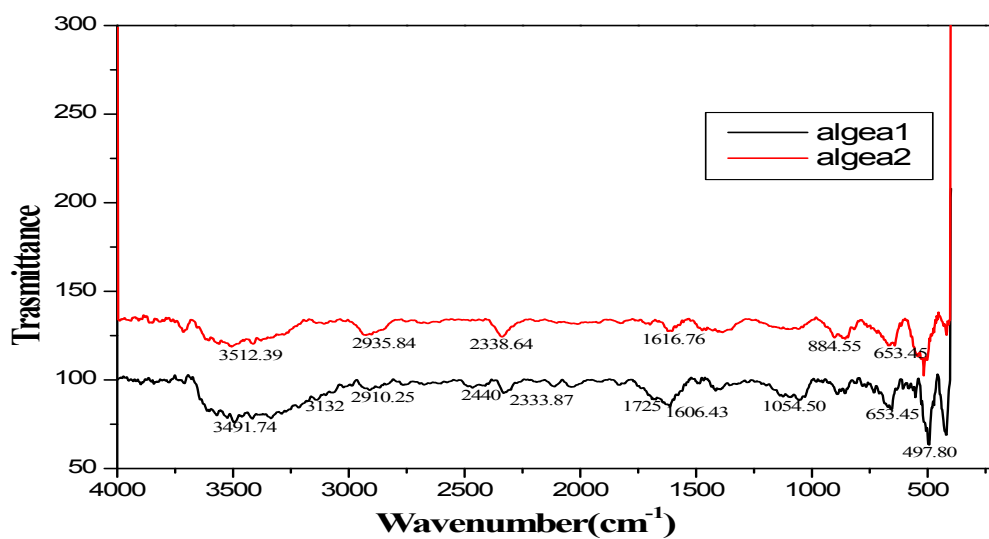

a

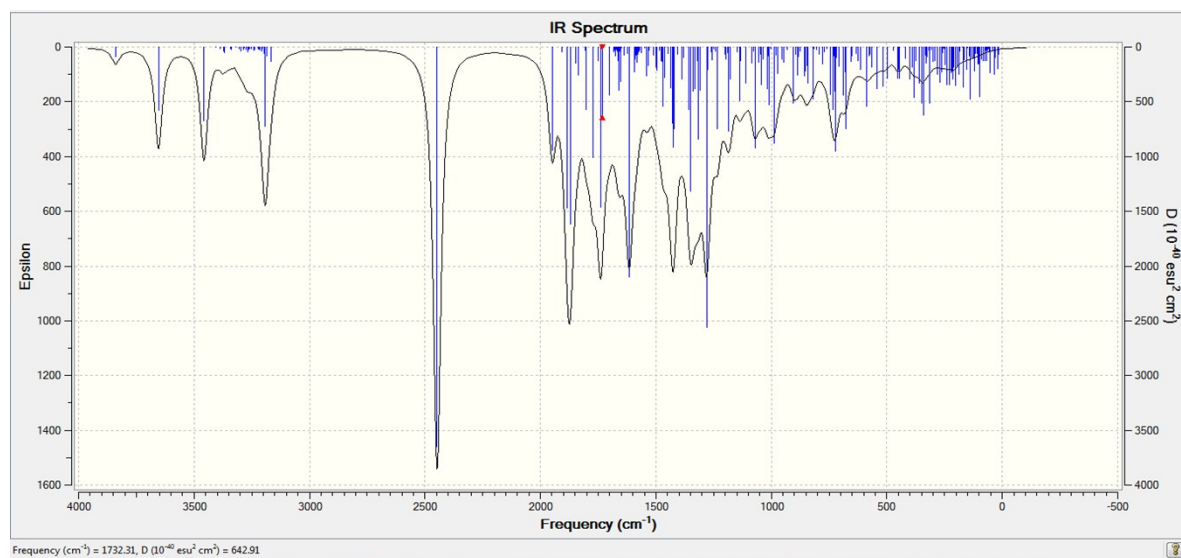

b

**Fig.S3** (a) Experimental FT-IR spectra of the algae and fluoride loaded algae (lower curve). (b) DFT computed FT-IR spectra of the optimized structure of Phycocyanobilin2 loaded with fluoride.

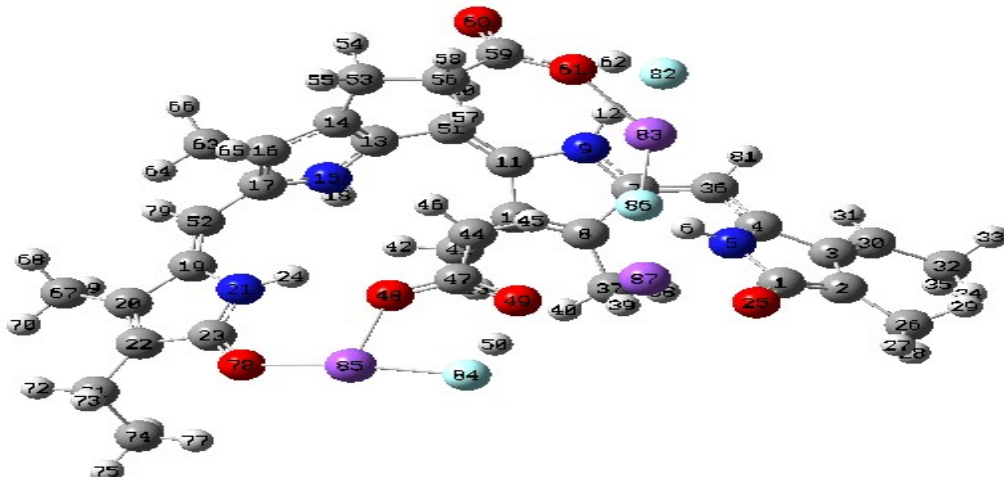

**Fig. S4:** optimized structure of Phycocyanobilin2 loaded with fluoride (Energy: -73680.85 eV; Dipole moment: 12.6 Debye; Hydrogen bond length in NH----F(86): 1.52 Å; C-OH---F(84): 1.03 Å and C-OH---F(82)---HN: 1.22 & 1.71 Å).

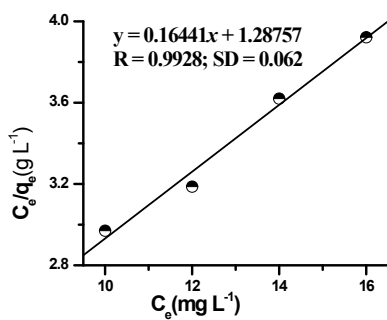

(a)

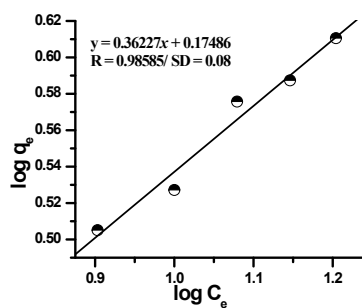

(b)

**Fig. S5:** (a) Langmuir isotherm (Plot of  $C_e$  vs  $C_e/q_e$ ) and (b) Freundlich isotherm ( $\log C_e$  vs  $\log q_e$ )

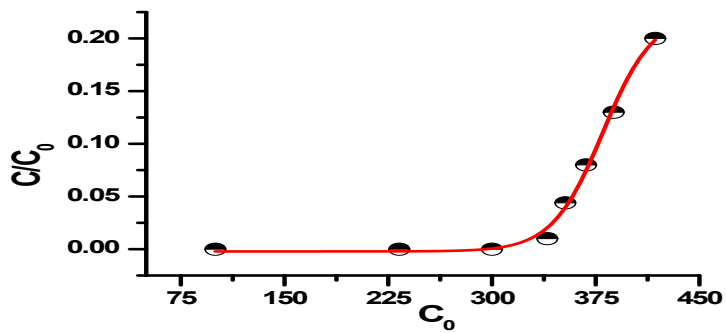

Fig. S6 Break-through curve

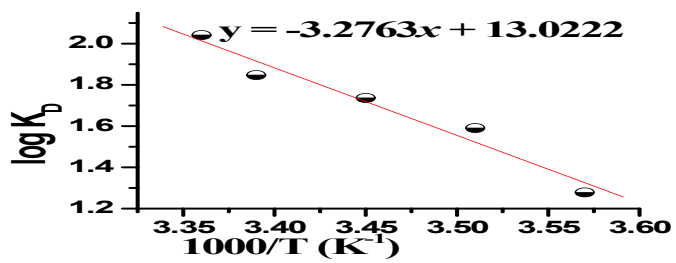

Fig. S7: Plot of  $1000/T$  vs  $\log K_d$

**Table S1:** FT-IR Peak positions and Peak assignment

| Peak position                                 | Nature of peak                                               | Peak assignment                                                                                                                                                                                                                                                                                                                                                                                        | Ref.     |
|-----------------------------------------------|--------------------------------------------------------------|--------------------------------------------------------------------------------------------------------------------------------------------------------------------------------------------------------------------------------------------------------------------------------------------------------------------------------------------------------------------------------------------------------|----------|
| 3132-3650 cm <sup>-1</sup>                    | Sharp and broad peak extend up to 3000 cm <sup>-1</sup>      | $\nu$ (N-H) in heterocyclic pyridyl ring and (C-O) in carboxylic acid; Formation of hydrogen bonds (Fig.9b) by electronegative fluoride. [NH stretching in NH---F(85) (DFT) at 3191.3 cm <sup>-1</sup> and NH stretching in N(9)H---F(82) (DFT) at 3456.9 cm <sup>-1</sup> ].                                                                                                                          | [15, 22] |
| 2440 cm <sup>-1</sup>                         | Sharp and broad peak                                         | $\nu$ (H-O) stretching in carboxylic acid. This new peak appears at 2440 cm <sup>-1</sup> (adjacent to C-O in -COOH in pure algae appears 2338 cm <sup>-1</sup> ) in the loaded exchanger only. [Peak at 2447.3 cm <sup>-1</sup> (DFT) was found to be present for $\nu$ (OH) stretching mode in F(84)---HOOC confirming the F <sup>-</sup> intake].                                                   | [15, 22] |
| 1616 cm <sup>-1</sup> ; 1725 cm <sup>-1</sup> | Sharp and broad. A new peak appears at 1725 cm <sup>-1</sup> | $\nu$ (N-H) in heterocyclic pyridyl ring and $\nu$ (C-O) in carboxylic acid; Formation of hydrogen bonds (Fig.9b) by electronegative fluoride. A new peak appears at 1725 cm <sup>-1</sup> in the loaded exchanger. [Peak at 1732.3 cm <sup>-1</sup> (DFT) was found to be present for $\nu$ (NH) bending and Peak at 1807.8 cm <sup>-1</sup> (DFT) for $\nu$ (OH) bending mode in NH---F(82)---HOOC]. | [15, 22] |

**Table S2:** Tolerance limits of foreign ions on the quantitative sorption (>93%) of fluoride;  
Experimental conditions: Biomass: 1.0 g; volume of solution: 100 mL; Concentration:  
0.02 mg mL<sup>-1</sup>; pH: Neutral pH.

---

Concentrations of foreign ions: 50-100 mM L<sup>-1</sup>

| I <sup>-</sup> | Cl <sup>-</sup> | Br <sup>-</sup> | SO <sub>4</sub> <sup>2-</sup> | PO <sub>4</sub> <sup>3-</sup> | CH <sub>3</sub> COO <sup>-</sup> | ClO <sub>4</sub> <sup>-</sup> |
|----------------|-----------------|-----------------|-------------------------------|-------------------------------|----------------------------------|-------------------------------|
| 30             | 20              | 20              | 50                            | 75                            | 40                               | 40                            |
| 60             | 40              | 40              | 60                            | 85                            | 70                               | 60                            |
| 90             | 80              | 80              | 100                           | 95                            | 100                              | 80                            |

---
